# Supplementary material
Source: Research Square preprint supplement (doi:10.21203/rs.3.rs-9703101/v1)
Supplement: Supplementary file 1 [file 61143229f8c66f830e1ce9ad.xlsx]

## Sheet: Sheet1
	Sample no	Total erythrocytes count	MN	%MN	PCE	NCE	PCE/NCE			%MN	Control	DMSO	MMC	Group I	Group II	Group III
Control	n1	1000	10	1	495	450	1.1				1	1.2	7.1	2.4	3.6	6.7
	n2	1000	15	1.5	550	500	1.1				1.5	1.1	7.8	2.5	3.4	6.8
	n3	1000	12	1.2	540	450	1.2				1.2	1	7.1	2.4	4	6.9
	n4	1000	13	1.3	440	400	1.1				1.3	1.2	7.6	2.8	4.3	6.5
	n5	1000	14	1.4	650	500	1.3				1.4	1.1	7.9	2.9	4	6.5
	n6	1000	12	1.2	480	400	1.2				1.2	1.4	7.7	2.5	3.9	6.5
DMSO	n1	1000	12	1.2	500	500	1			Mean	1.26667	1.16667	7.53333	2.58333	3.86667	6.65
	n2	1000	11	1.1	495	450	1.1			SD	0.166969	0.130268	0.333939	0.203753	0.305505	0.167874
	n3	1000	10	1	572	440	1.3
	n4	1000	12	1.2	528	480	1.1
	n5	1000	11	1.1	540	450	1.2			PCE/NCE	Control	DMSO	MMC	Group I	Group II	Group III
	n6	1000	14	1.4	517	470	1.1				1.1	1	0.6	0.91	0.75	0.62
MMC	n1	1000	71	7.1	360	600	0.6				1.1	1.1	0.62	0.89	0.71	0.59
	n2	1000	78	7.8	403	650	0.62				1.2	1.3	0.67	0.88	0.7	0.58
	n3	1000	71	7.1	402	600	0.67				1.1	1.1	0.61	0.95	0.71	0.55
	n4	1000	76	7.6	366	600	0.61				1.3	1.2	0.64	0.94	0.72	0.61
	n5	1000	79	7.9	352	550	0.64				1.2	1.1	0.6	0.96	0.73	0.62
	n6	1000	77	7.7	348	580	0.6			Mean	1.16667	1.13333	0.623333	0.921667	0.72	0.595
Group I	n1	1000	24	2.4	455	500	0.91			SD	0.0778499	0.0984732	0.0260536	0.0315748	0.0170561	0.0261116
	n2	1000	25	2.5	534	600	0.89
	n3	1000	24	2.4	484	550	0.88
	n4	1000	28	2.8	456	480	0.95
	n5	1000	29	2.9	423	450	0.94
	n6	1000	25	2.5	504	525	0.96
Group II	n1	1000	36	3.6	420	560	0.75
	n2	1000	34	3.4	426	600	0.71
	n3	1000	40	4	399	570	0.7
	n4	1000	43	4.3	355	500	0.71
	n5	1000	40	4	414	575	0.72
	n6	1000	39	3.9	438	600	0.73
Group III	n1	1000	67	6.7	372	600	0.62
	n2	1000	68	6.8	354	600	0.59
	n3	1000	69	6.9	377	650	0.58
	n4	1000	65	6.5	352	640	0.55
	n5	1000	65	6.5	366	600	0.61
	n6	1000	65	6.5	403	650	0.62
