# Supplementary material
Source: Research Square preprint supplement (doi:10.21203/rs.3.rs-9703101/v1)
Supplement: Supplementary file 2 [file 93483fe2cf296c9766796e79.xlsx]

## Sheet: Sheet1
	Body length
	Day 3						Day 5						Day 7						Day 9
	Control	VC	TPTH-L	TPTH-M	TPTH-H		Control	VC	TPTH-L	TPTH-M	TPTH-H		Control	VC	TPTH-L	TPTH-M	TPTH-H		Control	VC	TPTH-L	TPTH-M	TPTH-H
	13.1	13	12.2	11.1	10.2		25.2	25.1	23.5	21.2	18.5		35.5	35.3	32.8	30.1	27.2		45.2	44.9	41.5	38.2	34.5
	12.8	12.9	12.5	10.8	9.9		24.8	24.7	23.8	20.8	18.1		34.8	34.9	33.2	29.7	26.8		44.5	44.6	41.9	37.8	34.1
	13.3	13.1	12.1	11.3	10.4		25.5	25.4	23.2	21.5	18.8		36.1	35.8	32.5	30.5	27.5		45.8	45.5	41.2	38.5	34.8
	13	12.8	12.3	11	10		25.1	25	23.4	21.1	18.3		35.2	35.1	32.9	30	27		45	44.8	41.6	38	34.3
	12.9	13.2	12.4	10.9	9.8		24.9	25.2	23.7	20.9	18.2		35	35.4	33.1	29.8	26.9		44.7	45.1	41.8	37.9	34.2
	13.2	13	12.2	11.2	10.1		25.3	24.9	23.3	21.3	18.6		35.6	35.2	32.7	30.2	27.3		45.3	45	41.4	38.3	34.6
AVRG	13.05	13	12.2833	11.05	10.0667		25.1333	25.05	23.4833	21.1333	18.4167		35.3667	35.2833	32.8667	30.05	27.1167		45.0833	44.9833	41.5667	38.1167	34.4167
STDEV	0.178377	0.13484	0.140346	0.178377	0.205971		0.246183	0.231595	0.22088	0.246183	0.251661		0.445856	0.291807	0.246183	0.27469	0.251661		0.440729	0.291807	0.246183	0.251661	0.251661
	Head + Bill
	Day 3						Day 5						Day 7						Day 9
	Control	VC	TPTH-L	TPTH-M	TPTH-H		Control	VC	TPTH-L	TPTH-M	TPTH-H		Control	VC	TPTH-L	TPTH-M	TPTH-H		Control	VC	TPTH-L	TPTH-M	TPTH-H
	2.8	2.7	2.5	2.2	2		6.5	6.4	5.9	5.4	4.9		10.5	10.4	9.4	8.7	7.9		15.4	15.3	14.1	12.9	11.4
	2.9	2.8	2.6	2.1	1.9		6.7	6.6	6.1	5.2	5.1		10.8	10.6	9.6	8.5	8.1		15.8	15.6	14.4	12.7	11.2
	2.7	2.9	2.4	2.3	2		6.4	6.7	5.8	5.5	4.8		10.3	10.7	9.2	8.9	7.8		15.2	15.7	13.9	13.2	11.6
	3	2.7	2.5	2.2	1.8		6.6	6.5	6	5.3	5		10.6	10.5	9.5	8.6	8		15.5	15.4	14.2	13	11.3
	2.8	2.8	2.6	2.1	2.1		6.8	6.6	6.1	5.4	4.7		10.9	10.6	9.7	8.7	7.7		16	15.5	14.5	12.8	11.5
	2.8	3	2.5	2.2	1.9		6.5	6.7	5.9	5.3	4.9		10.4	10.7	9.4	8.8	7.9		15.3	15.7	14.1	13.1	11.4
AVRG	2.83333	2.81667	2.51667	2.18333	1.95		6.58333	6.58333	5.96667	5.35	4.9		10.5833	10.5833	9.46667	8.7	7.9		15.5333	15.5333	14.2	12.95	11.4
STDEV	0.0984732	0.111464	0.0717741	0.0717741	0.1		0.140346	0.111464	0.11547	0.1	0.13484		0.22088	0.111464	0.166969	0.13484	0.13484		0.293361	0.1557	0.208893	0.178377	0.13484
	Eye Diameter
	Day 3						Day 5						Day 7						Day 9
	Control	VC	TPTH-L	TPTH-M	TPTH-H		Control	VC	TPTH-L	TPTH-M	TPTH-H		Control	VC	TPTH-L	TPTH-M	TPTH-H		Control	VC	TPTH-L	TPTH-M	TPTH-H
	1.2	1.1	1	0.9	0.7		3.5	3.4	3.1	2.8	2.4		4.9	4.8	4.3	3.7	3.2		8	7.9	7.4	6.7	5.9
	1.3	1.2	1.1	0.8	0.8		3.6	3.5	3.2	2.7	2.3		5.1	5	4.5	3.6	3.1		8.3	8.1	7.6	6.5	5.8
	1.2	1.3	1	0.9	0.7		3.4	3.6	3	2.9	2.5		4.8	5.1	4.2	3.9	3.4		7.9	8.2	7.3	6.9	6.1
	1.2	1.2	0.9	0.9	0.7		3.5	3.5	3.2	2.6	2.2		5	4.9	4.4	3.7	3.2		8.1	8	7.5	6.7	5.9
	1.1	1.2	1	0.8	0.6		3.7	3.4	3.3	2.8	2.4		5.2	5	4.6	3.8	3.1		8.4	8.1	7.7	6.6	6
	1.3	1.1	1.1	0.9	0.7		3.5	3.6	3.1	2.7	2.3		4.9	5.1	4.3	3.7	3.2		8	8.2	7.4	6.8	6
AVRG	1.21667	1.18333	1.01667	0.866667	0.7		3.53333	3.5	3.15	2.75	2.35		4.98333	4.98333	4.38333	3.73333	3.2		8.11667	8.08333	7.48333	6.7	5.95
STDEV	0.0717741	0.0717741	0.0717741	0.0492366	0.0603023		0.0984732	0.0852803	0.1	0.1	0.1		0.140346	0.111464	0.140346	0.0984732	0.104447		0.185047	0.111464	0.140346	0.13484	0.1
	Forelimb
	Day 3						Day 5						Day 7						Day 9
	Control	VC	TPTH-L	TPTH-M	TPTH-H		Control	VC	TPTH-L	TPTH-M	TPTH-H		Control	VC	TPTH-L	TPTH-M	TPTH-H		Control	VC	TPTH-L	TPTH-M	TPTH-H
	0.4	0.4	0.3	0.2	0.1		2.8	2.7	2.4	2.1	1.8		5.3	5.2	4.7	4.1	3.7		11.3	11.2	10.1	9	7.9
	0.5	0.4	0.4	0.2	0.2		2.9	2.8	2.6	2	1.7		5.5	5.4	4.9	4	3.6		11.7	11.5	10.4	8.8	7.8
	0.4	0.5	0.3	0.3	0.1		2.7	2.9	2.3	2.2	1.9		5.2	5.5	4.6	4.3	3.8		11.1	11.6	9.9	9.3	8.2
	0.4	0.4	0.3	0.2	0.1		2.8	2.7	2.5	2.1	1.7		5.4	5.3	4.8	4.1	3.6		11.4	11.3	10.2	9.1	8
	0.5	0.4	0.4	0.2	0.2		3	2.8	2.6	2	1.8		5.6	5.4	5	4.2	3.7		11.9	11.4	10.5	8.9	8.1
	0.4	0.5	0.3	0.2	0.1		2.8	2.9	2.4	2.1	1.8		5.3	5.5	4.7	4.1	3.7		11.2	11.6	10.1	9.2	8
AVRG	0.433333	0.433333	0.333333	0.216667	0.133333		2.83333	2.8	2.46667	2.08333	1.78333		5.38333	5.38333	4.78333	4.13333	3.68333		11.4333	11.4333	10.2	9.05	8
STDEV	0.0492366	0.0492366	0.0492366	0.0389249	0.0492366		0.0984732	0.0852803	0.11547	0.0717741	0.0717741		0.140346	0.111464	0.140346	0.0984732	0.0717741		0.293361	0.1557	0.208893	0.178377	0.13484
	Hindlimb
	Day 3						Day 5						Day 7						Day 9
	Control	VC	TPTH-L	TPTH-M	TPTH-H		Control	VC	TPTH-L	TPTH-M	TPTH-H		Control	VC	TPTH-L	TPTH-M	TPTH-H		Control	VC	TPTH-L	TPTH-M	TPTH-H
	0.3	0.3	0.2	0.1	0.1		2.5	2.4	2.1	1.8	1.5		6.6	6.5	5.7	5	4.3		14.8	14.7	13.4	12.2	10.7
	0.4	0.3	0.3	0.2	0.1		2.7	2.5	2.3	1.7	1.4		6.9	6.7	5.9	4.9	4.2		15.3	15.1	13.8	12	10.5
	0.3	0.4	0.2	0.1	0.1		2.4	2.6	2	1.9	1.6		6.5	6.8	5.6	5.2	4.5		14.6	15.2	13.2	12.5	10.9
	0.3	0.3	0.2	0.1	0		2.5	2.5	2.2	1.8	1.5		6.7	6.6	5.8	5	4.3		14.9	14.8	13.6	12.3	10.6
	0.4	0.3	0.3	0.2	0.1		2.6	2.4	2.3	1.7	1.4		7	6.7	6	5.1	4.4		15.5	14.9	13.9	12.1	10.8
	0.3	0.4	0.2	0.1	0.1		2.5	2.6	2.1	1.8	1.5		6.6	6.8	5.7	5.1	4.3		14.7	15.1	13.5	12.4	10.7
AVRG	0.333333	0.333333	0.233333	0.133333	0.0833333		2.53333	2.5	2.16667	1.78333	1.48333		6.71667	6.68333	5.78333	5.05	4.33333		14.9667	14.9667	13.5667	12.25	10.7
STDEV	0.0492366	0.0492366	0.0492366	0.0492366	0.0389249		0.0984732	0.0852803	0.11547	0.0717741	0.0717741		0.185047	0.111464	0.140346	0.1	0.0984732		0.33934	0.187487	0.246183	0.178377	0.13484

## Sheet: Sheet2
Body length									Head + Bill									Eye Diameter
		Control	VC	TPTH-L	TPTH-M	TPTH-H					Control	VC	TPTH-L	TPTH-M	TPTH-H					Control	VC	TPTH-L	TPTH-M	TPTH-H
Day 3	AVRG	13.05	13	12.2833	11.05	10.0667			Day 3	AVRG	2.83333	2.81667	2.51667	2.18333	1.95			Day 3	AVRG	1.21667	1.18333	1.01667	0.866667	0.7
	STDEV	0.178377	0.13484	0.140346	0.178377	0.205971				STDEV	0.0984732	0.111464	0.0717741	0.0717741	0.1				STDEV	0.0717741	0.0717741	0.0717741	0.0492366	0.0603023
Day 5	AVRG	25.1333	25.05	23.4833	21.1333	18.4167			Day 5	AVRG	6.58333	6.58333	5.96667	5.35	4.9			Day 5	AVRG	3.53333	3.5	3.15	2.75	2.35
	STDEV	0.246183	0.231595	0.22088	0.246183	0.251661				STDEV	0.140346	0.111464	0.11547	0.1	0.13484				STDEV	0.0984732	0.0852803	0.1	0.1	0.1
Day 7	AVRG	35.3667	35.2833	32.8667	30.05	27.1167			Day 7	AVRG	10.5833	10.5833	9.46667	8.7	7.9			Day 7	AVRG	4.98333	4.98333	4.38333	3.73333	3.2
	STDEV	0.445856	0.291807	0.246183	0.27469	0.251661				STDEV	0.22088	0.111464	0.166969	0.13484	0.13484				STDEV	0.140346	0.111464	0.140346	0.0984732	0.104447
Day 9	AVRG	45.0833	44.9833	41.5667	38.1167	34.4167			Day 9	AVRG	15.5333	15.5333	14.2	12.95	11.4			Day 9	AVRG	8.11667	8.08333	7.48333	6.7	5.95
	STDEV	0.440729	0.291807	0.246183	0.251661	0.251661				STDEV	0.293361	0.1557	0.208893	0.178377	0.13484				STDEV	0.185047	0.111464	0.140346	0.13484	0.1
Forelimb									Hindlimb
		Control	VC	TPTH-L	TPTH-M	TPTH-H					Control	VC	TPTH-L	TPTH-M	TPTH-H
Day 3	AVRG	0.433333	0.433333	0.333333	0.216667	0.133333			Day 3	AVRG	0.333333	0.333333	0.233333	0.133333	0.0833333
	STDEV	0.0492366	0.0492366	0.0492366	0.0389249	0.0492366				STDEV	0.0492366	0.0492366	0.0492366	0.0492366	0.0389249
Day 5	AVRG	2.83333	2.8	2.46667	2.08333	1.78333			Day 5	AVRG	2.53333	2.5	2.16667	1.78333	1.48333
	STDEV	0.0984732	0.0852803	0.11547	0.0717741	0.0717741				STDEV	0.0984732	0.0852803	0.11547	0.0717741	0.0717741
Day 7	AVRG	5.38333	5.38333	4.78333	4.13333	3.68333			Day 7	AVRG	6.71667	6.68333	5.78333	5.05	4.33333
	STDEV	0.140346	0.111464	0.140346	0.0984732	0.0717741				STDEV	0.185047	0.111464	0.140346	0.1	0.0984732
Day 9	AVRG	11.4333	11.4333	10.2	9.05	8			Day 9	AVRG	14.9667	14.9667	13.5667	12.25	10.7
	STDEV	0.293361	0.1557	0.208893	0.178377	0.13484				STDEV	0.33934	0.187487	0.246183	0.178377	0.13484
