# Supplementary material
Source: Research Square preprint supplement (doi:10.21203/rs.3.rs-9703101/v1)
Supplement: Supplementary file 3 [file b163bb64b874289374c0317e.xlsx]

## Sheet: Final
Time (hours)	300 (µg/egg)						350 (µg/egg)						400 (µg/egg)						450 (µg/egg)						500 (µg/egg)
24	6	6	6	5	5	5	6	6	6	5	5	5	6	5	5	5	5	5	5	4	4	4	4	4	4	4	4	3	3	3
48	6	5	5	5	5	5	5	5	4	4	4	4	4	4	4	3	3	3	3	3	3	3	2	2	2	2	2	2	1	1
72	5	5	5	5	4	4	4	4	4	3	3	3	3	3	3	2	2	2	2	2	2	1	1	1	1	1	1	1	1	0
96	5	4	4	4	4	4	3	3	3	3	2	2	2	2	2	2	1	1	1	1	1	1	1	1	0	0	0	0	0	0
Time (hours)	300 (µg/egg) %						350 (µg/egg) %						400 (µg/egg) %						450 (µg/egg) %						500 (µg/egg) %
0	100	100	100	100	100	100	100	100	100	100	100	100	100	100	100	100	100	100	100	100	100	100	100	100	100	100	100	100	100	100
24	100	100	100	83	83	83	100	100	100	83	83	83	100	83	83	83	83	83	83	67	67	67	67	67	67	67	67	50	50	50
48	100	83	83	83	83	83	83	83	67	67	67	67	67	67	67	50	50	50	50	50	50	50	33	33	33	33	33	33	17	17
72	83	83	83	83	67	67	67	67	67	50	50	50	50	50	50	33	33	33	33	33	33	17	17	17	17	17	17	17	17	0
96	83	67	67	67	67	67	50	50	50	50	33	33	33	33	33	33	17	17	17	17	17	17	17	17	0	0	0	0	0	0
